# Supplementary material
Source: Springer Nature journal article supplement (https://www.springermedizin.de/resource/supplementary/12960_2013_425_MOESM1_ESM.pdf/9570050)
Supplement: MOESM1 [file 9570050]

**Case-control study**  
(First 2 years of program activities)

**Prospective cohort study**  
(3<sup>rd</sup> year of program activities)

146 dropout CHWs (cases)

542 retained CHWs (controls)

120 dropout CHWs

422 retained CHWs
